# Supplementary material
Source: PubMed Central journal article supplement (PMC3149349)
Supplement: supp_M111.241794_jbc.M111.241794-1.pdf [file supp_M111.241794_jbc.M111.241794-1.pdf]

## SUPPLEMENTARY INFORMATION

### Figure legends

**Fig. S1. Characterizations of spontaneous superoxide flashes in HeLa cells.** **a**, Colocalization of  $\Delta\Psi_m$  indicator TMRM and the superoxide biosensor mt-cpYFP at the mitochondrion level (upper) and time courses of superoxide flash and concurrent  $\Delta\Psi_m$  depolarization. Scale bars: 5  $\mu\text{m}$ . **b**, Swelling of flashing mitochondria. Paired traces of local change of mt-cpYFP signal (upper traces) and mitochondrial width (lower traces) scanned at 488 nm and 405 nm excitation. Notice the lack of change of cpYFP signal at 405 nm excitation during swelling and flashing. Scale bar: 5  $\mu\text{m}$ . **c**, Effect of mPTP inhibitors, CsA (5  $\mu\text{M}$ , n=30 cells) and BA (100  $\mu\text{M}$ , n=31 cells), on superoxide flash activity.

**Fig. S2. Characteristics of superoxide flashes in HeLa cells.** Data shown are for superoxide flashes in the single or network mitochondria in untreated intact cells, or cells with CypD overexpression (OE) or knockdown (KD), or cells treated with selenite (10  $\mu\text{M}$ , 12 hrs) in the presence of ROS scavengers, n=17-83 flashes.

**Fig. S3. a**, Proportions of punctiform, filiform, and network mitochondrial superoxide flashes. Selenite: 10  $\mu\text{M}$ , staurosporine (STS): 0.2  $\mu\text{M}$ , 12 hrs. Mock: cells transfected with vectors; OE: CypD overexpression; KD: CypD knockdown; Bax mutant: Bax C62/126S. n=15-62 flashes. **b**, Reversible activity of superoxide flash activity in response to brief selenite treatment (10  $\mu\text{M}$ , 1 hr). n= 36-44 cells.

**Fig. S4. Effects of CypD manipulation on H<sub>2</sub>O<sub>2</sub>-induced superoxide flashes and apoptosis.** **a**, Superoxide flash frequency in CypD-manipulated cells in the absence or presence of H<sub>2</sub>O<sub>2</sub> (120  $\mu\text{M}$ , 6 hr). **b**, Global ROS level after H<sub>2</sub>O<sub>2</sub> treatment (120  $\mu\text{M}$ , 6 hr) was unaffected by CypD overexpression or knockdown. **c**, Overexpression of CypD exaggerated, and downregulation of CypD mitigated H<sub>2</sub>O<sub>2</sub> (120  $\mu\text{M}$ , 12 hr)-induced apoptosis. Data are mean  $\pm$  s.e.m., n = 13-27 cells for frequency analysis. n = 10<sup>4</sup> cells from 4 experiments for apoptosis assay. \*, p <0.05; \*\*, p <0.01; \*\*\*, p <0.001 *versus* mock or scrambled controls. Mock, vector

control; CypD OE, overexpression of CypD; Scramble, scrambled CypD siRNA.

**Fig. S5. Expression of Bcl-2 family proteins.** **a**, Typical western blot showing Bcl-2 protein level in HeLa cells overexpressing Bcl-2-flag. **b**, Typical western blot showing Bax protein level in HeLa cells transfected with Bax-mCherry or Bax C62/126S-mCherry.

### **Movie legends**

**Movie 1.** Spontaneous superoxide flashes in network mitochondria in a resting HeLa cell.

**Movie 2.** Synchronous mitochondrial swelling and superoxide flashes.

**Movie 3.** Superoxide flashes in punctiform mitochondria in a HeLa cell treated with selenite for 6 hours.

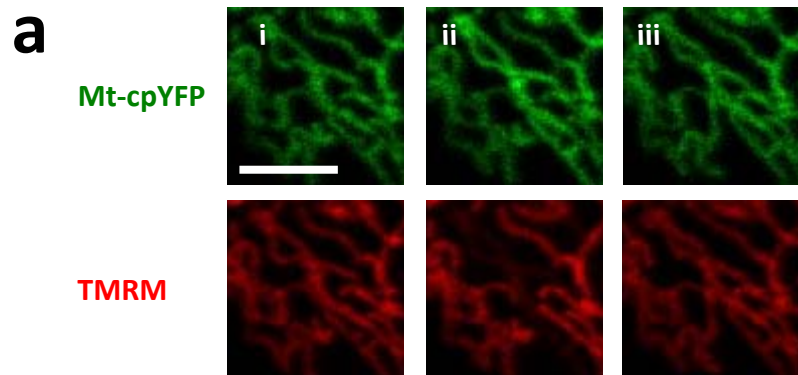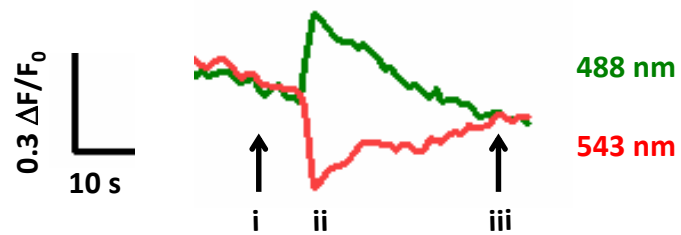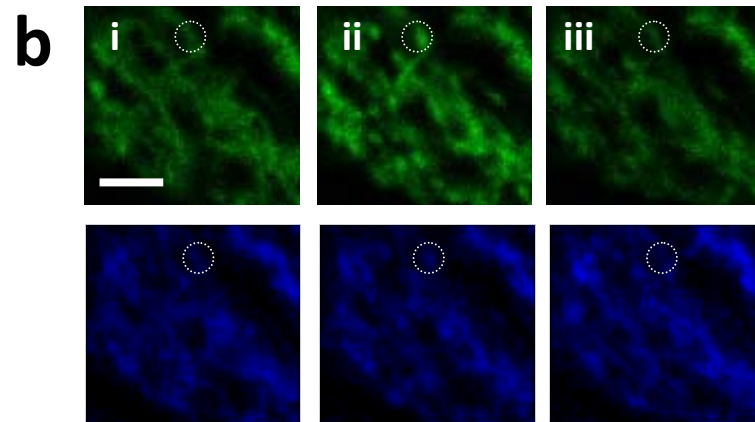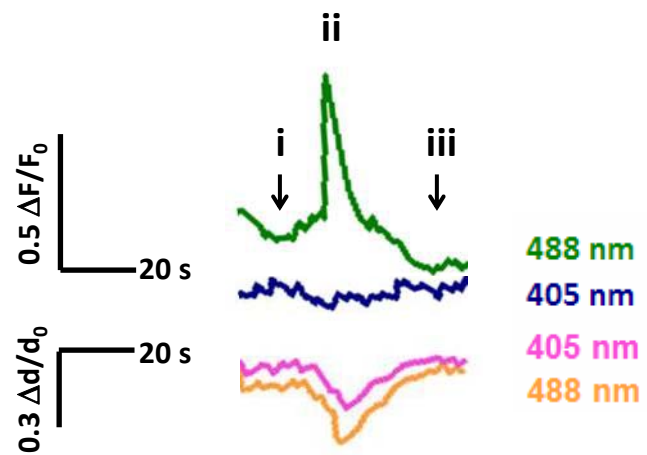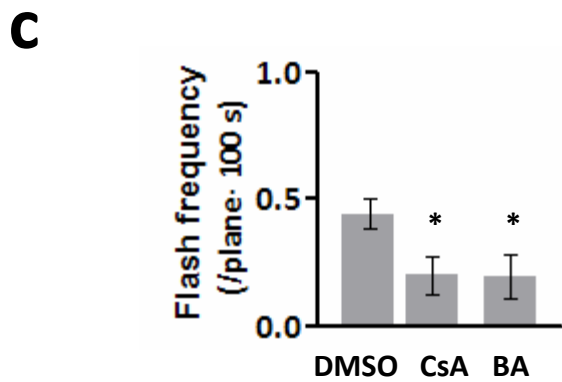

Fig. S1

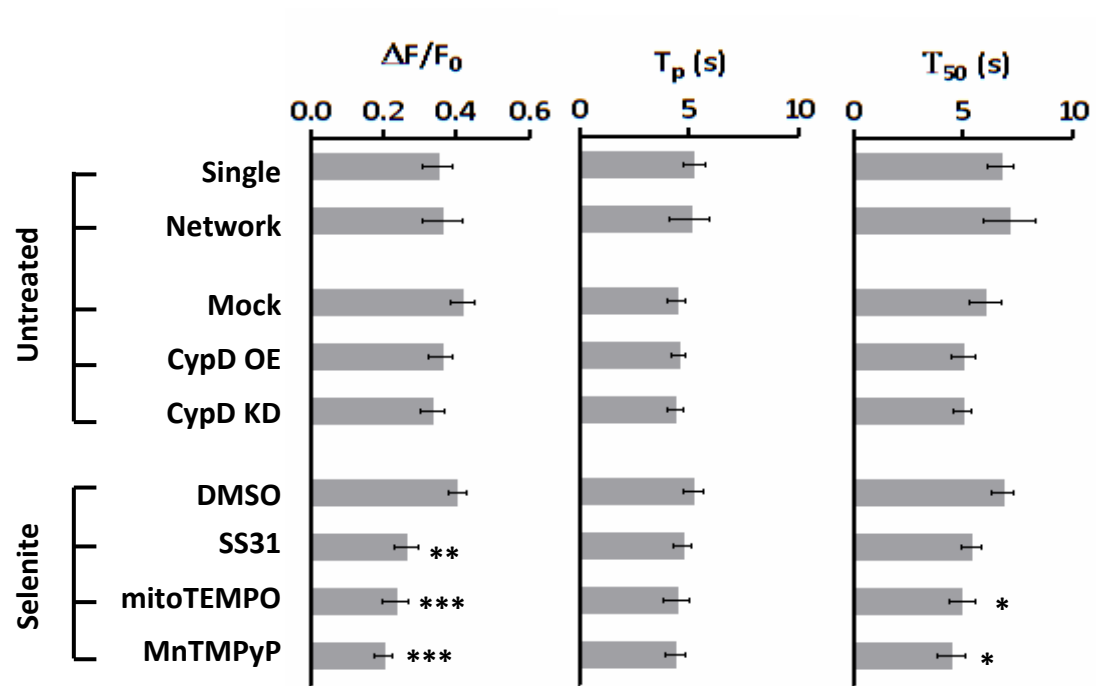

Fig. S2

**a**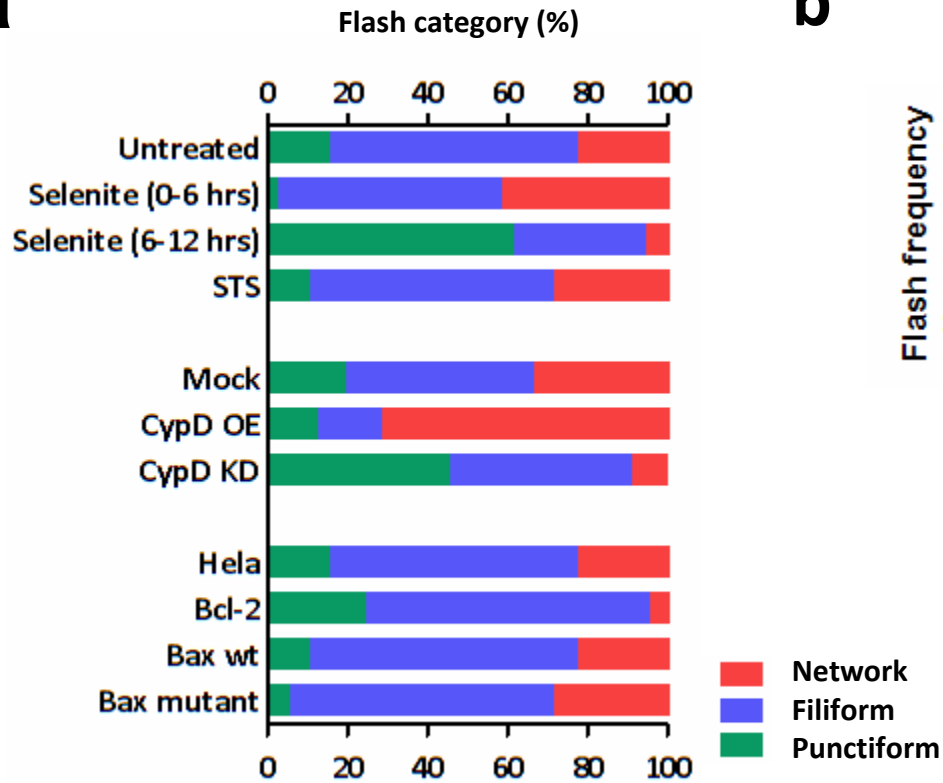**b**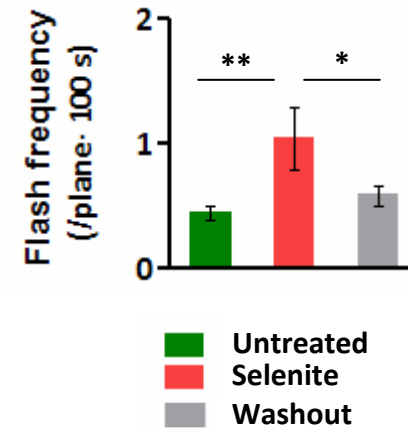

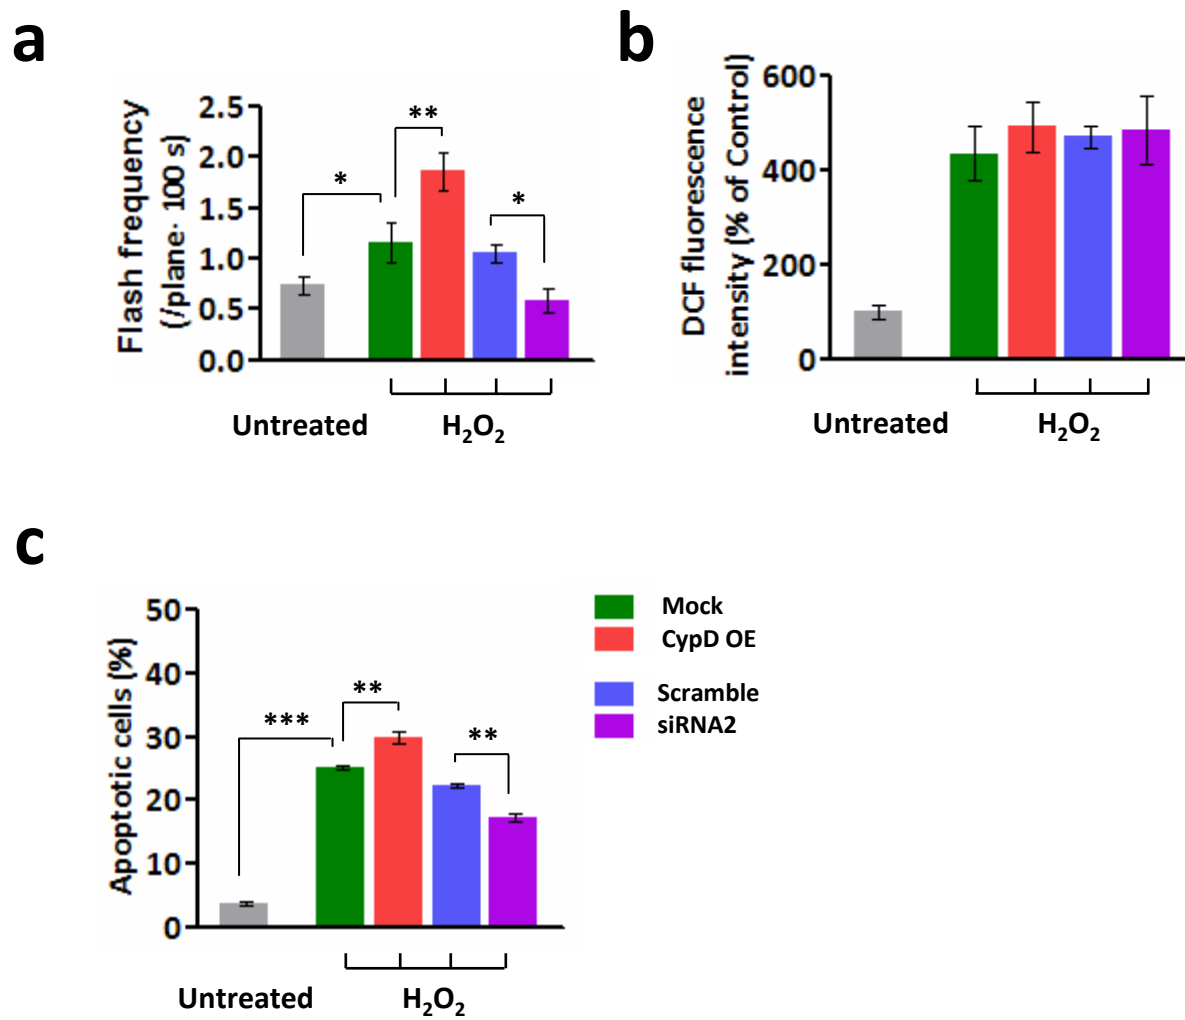

Fig. S4

**a**

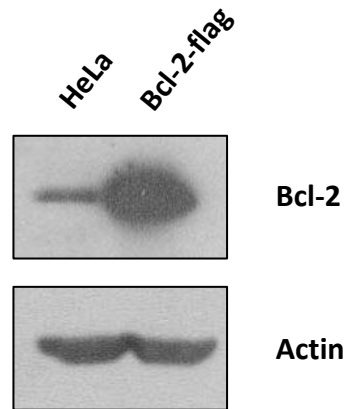

**b**

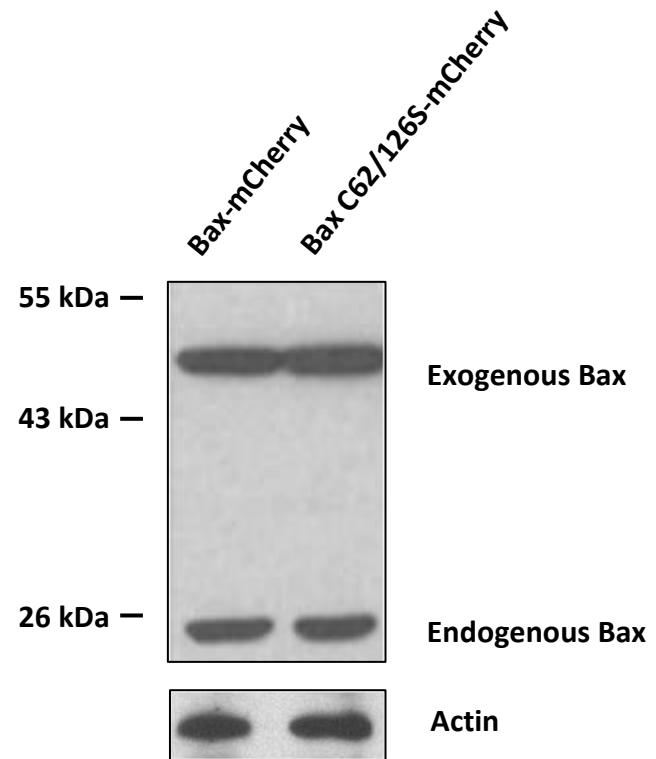

**Fig. S5**
